# Supplementary material
Source: PubMed Central journal article supplement (PMC9400410)
Supplement: NIHMS1824113-supplement-Supplement.pdf [file NIHMS1824113-supplement-Supplement.pdf]

## SUPPLEMENTAL MATERIAL

### Supplemental methods

#### *Definition of PKP2 truncating variants*

*PKP2*tv were defined as the consequence of single nucleotide variants that create a premature stop codon or disrupt a splice site; small insertions or deletions leading to a shift in the reading frame; and larger deletions encompassing single or multiple exons (CNVs). Splice variants were defined as canonical if located within the intronic donor and acceptor sites (GT-AG) and first and last two exonic nucleotides, and non-canonical at other intronic locations. As exon 6 is not expressed in the cardiac isoform of *PKP2* (*PKP2A*), variants identified in this exon and associated exon-intron boundaries (12:32996247-12:32996115) were not included.<sup>34</sup> Two frameshift variants at amino acid residues 323 and 325 leading to apparent premature truncation have been shown to cause missense variation so were also not included.<sup>35</sup> All variants were classified using reference sequence GRCh38. Missense variants and in-frame deletions were excluded. Mutant mRNA transcripts where the sequence variant was located 55 base pairs upstream from the terminal 3' exon-exon boundary were considered to undergo nonsense mediated mRNA decay (NMD).<sup>36</sup>

#### *Identification previously reported PKP2tv associated with ARVC*

Probands fulfilling Task Force criteria for the diagnosis of ARVC (referred to subsequently as 'ARVC cohort') with associated *PKP2*tv were identified from publications in publicly available medical literature and cited in PubMed related to arrhythmogenic right ventricular cardiomyopathy (ARVC) and truncating variants in *PKP2* (*PKP2*tv). Data was also sourced from a publicly available database, created and hosted by the Leiden University Medical Center (LUMC)<sup>1</sup>, and all identified cases cross referenced to the original article. This database is no longer available. A targeted literature search was performed up January 2021 to identify suitable publications. The

comprehensive search used the following terms; (((arrhythmogenic right ventricular [Title]) AND *PKP2*[Title])) OR ((arrhythmogenic right ventricular[Title]) AND plakophilin-2[Title])) OR ((arrhythmogenic[Title] AND cardiomyopathy[ti]) AND plakophilin-2[Title]) ("*PKP2* protein, human"[nm]) AND ("arrhythmogenic right ventricular dysplasia"[MeSH Terms] OR "arrhythmogenic right ventricular dysplasia"[All Fields] OR "arrhythmogenic right ventricular cardiomyopathy"[All Fields]) (((*PKP2*) OR plakophilin 2)) AND ("arrhythmogenic right ventricular dysplasia"[MeSH Terms] OR "arrhythmogenic right ventricular dysplasia"[All Fields] OR "arrhythmogenic right ventricular cardiomyopathy"[All Fields]).

All English language publications identified through the PubMed search were reviewed by two investigators (RJH/DJA) for the number of cases who had a clinical diagnosis of ARVC based on the 2010 Task Force Criteria (or the preceding 1994 Criteria where relevant),<sup>2</sup> associated with a heterozygous *PKP2*tv. To avoid double counting the same proband, publications from the same authors or institutions were cross referenced and only included once unless it was evident that cases were not previously reported based on age, sex and specific *PKP2*tv. Patients with more than one variant in *PKP2* or other desmosomal genes, unexplained cardiac arrest or sudden death and no additional diagnostic characteristics, and those with non-ARVC phenotypes were excluded. Family members were not included. The manuscripts are listed in the supplementary appendix below.

#### *Classification of UK Biobank participants with PKP2tv*

Individuals with *PKP2*tv were identified in the UK Biobank (2<sup>nd</sup> release; October 2020), a large scale, prospective biomedical database with in-depth whole exome sequencing available on 200,643 individuals enrolled between the ages of 40 and 69 at the time of recruitment.

Cardiovascular and other clinical data is available for all participants, ascertained through primary care and hospital records, death records and self-reported medical conditions, recorded using ICD-9 or ICD-10 codes, and evidence for specific diagnoses and procedures is included in

the Biobank when identified through any of these sources. Data includes evidence of ischemic heart disease; heart failure; hypertension; atrial and ventricular arrhythmia; surgical and interventional cardiac procedures. Cardiac magnetic resonance (CMR) data included left ventricular ejection fraction (LVEF; %); left ventricular end diastolic function (LVEDV; ml/m<sup>2</sup>); and cardiac index (L/m<sup>2</sup>). Numerical data derived from 12-lead ECGs data including QRS duration and QT interval corrected for heart rate (QTc) was included, but as actual electrocardiographic traces were not accessible, repolarization patterns and T-wave polarity were not part of the analysis.

Demographic and clinical data was manually curated to identify specific cardiac phenotypes. A diagnosis consistent with ARVC was determined based on cardiovascular features consistent with the condition. To assess the frequency of *PKP2*tv in the absence of manifest clinical disease, individuals with ARVC were removed from further analysis and the remainder without ARVC were used as controls (referred to subsequently as 'UKB cohort').

To determine if *PKP2*tv act as a risk allele for the development of atrial fibrillation (AF), heart failure and ventricular tachycardia (VT) without a diagnosis of ARVC, we assessed the prevalence of these features in those with *PKP2*tv; the proportion of those with AF was compared to all other UK Biobank participants.

#### *Calculation of minor allelic frequency*

To compare the prevalence of *PKP2*tv between the UKB cohort and ARVC cohort, the minor allele frequency (MAF) was calculated for all variants identified in both cohorts. For the ARVC cohort comprised of *PKP2*tv previously reported in the literature, we assumed a disease prevalence of 1 in 5000 in the population,<sup>37</sup> and based on the most comprehensive report to date detailing the

genetic findings in 1001 patients with ARVC that 42.1% of individuals with ARVC was associated with a *PKP2*tv.<sup>4</sup> As such, the population prevalence of ARVC and a *PKP2*tv was  $((1/5000)/0.421) = 8.42 \times 10^{-5}$ . Each identified *PKP2*tv was expressed as a proportion of the overall variant number.

The MAF of each *PKP2*tv was defined by the population prevalence ( $8.42 \times 10^{-5}$ ), the proportion of any *PKP2*tv to the overall burden, and the biallelic nature of individuals; therefore,  $MAF = (8.42 \times 10^{-5} \times \text{variant proportion (\%)}) \times 0.5$ . For example, Arg413\* was identified in 16 ARVC probands and represents 3.27% of the overall contribution of *PKP2*tv to ARVC (16/489). The MAF is therefore calculated as  $(8.42 \times 10^{-5} \times 0.0327) \times 0.5 = 1.38 \times 10^{-6}$ .

The MAF of each variant identified in UKB controls was defined as the number of times each variant was identified relative to the overall number of participants (200,643).

#### *Comparison of allelic frequency between UKB cohort and ARVC cohort*

Only *PKP2*tv where the nucleotide substitution, insertion or deletion was identical were included for comparative analysis. The association between *PKP2*tv and clinical ARVC was assessed by comparison of the MAF within each group to define the odds ratio (OR) with 95% confidence intervals for each, where a ratio of >1 would favor a diagnosis of ARVC and a ratio <1 would favor non-penetrant or sub-clinical disease. As CNV were not called in the UK Biobank these were not included in the comparative analysis.

#### *In silico analysis*

The predicted deleterious effect of variants in both the ARVC cohort and UKB cohort was assessed using in silico analysis. Premature stop codons and frameshift (insertion/deletions) variants were assessed using combined annotation-dependent depletion (CADD),<sup>38</sup> and splice variants using Splice AI.<sup>39</sup>

### *Statistical analysis*

The odds ratios for the MAF between the ARVC cohort and UKB cohort were calculated with Fisher's exact test (in R) and p-values were Bonferroni corrected to account for multiple testing, with significance level of adjusted to  $p < 0.0025$ . The OR for prevalence of AF, heart failure and ventricular tachycardia in those with and without *PKP2*tv in UK Biobank was similarly calculated with significance level at  $<0.05$ . In silico analyses between respective groups were compared using a two-sided t-test with significance level at  $<0.05$ . Statistical analysis was performed using R.

**Supplementary table I: 47 PKP2 truncating variants identified in 326 UK Biobank participants.**

| Transcript Consequence                | Consequence      | Categorization        | N (probands) | Proportion |
|---------------------------------------|------------------|-----------------------|--------------|------------|
| c.2146-1G>C                           | .                | Splice; acceptor      | 46           | 23.8%      |
| c.2203C>T                             | p.Arg735X        | Premature stop codon  | 40           | 20.7%      |
| c.148_151delACAG                      | p.Thr50SerfsX61  | Deletion; frameshift  | 18           | 9.3%       |
| c.337-2A>T                            | .                | Splice; acceptor      | 8            | 4.1%       |
| c.275T>A                              | p.Leu92X         | Premature stop codon  | 6            | 3.1%       |
| c.1821dupT                            | p.Val608CysfsX6  | Insertion; frameshift | 6            | 3.1%       |
| c.2489+1G>A                           | .                | Splice; donor         | 6            | 3.1%       |
| c.253_256delGAGT                      | p.Glu85MetfsX26  | Deletion; frameshift  | 5            | 2.6%       |
| c.2312_2313delTC                      | p.Leu771ProfsX2  | Deletion; frameshift  | 5            | 2.6%       |
| c.663C>A                              | p.Tyr221X        | Premature stop codon  | 4            | 2.1%       |
| c.358G>T                              | p.Glu120X        | Premature stop codon  | 4            | 2.1%       |
| c.1237C>T                             | p.Arg413X        | Premature stop codon  | 3            | 1.6%       |
| c.2453dupG                            | p.Ile819GlyfsX9  | Insertion; frameshift | 3            | 1.6%       |
| c.1132C>T                             | p.Gln378X        | Premature stop codon  | 2            | 1.0%       |
| c.1709delC                            | p.Ala570ValfsX7  | Deletion; frameshift  | 2            | 1.0%       |
| c.1754C>G                             | p.Ser585X        | Premature stop codon  | 2            | 1.0%       |
| c.1917_1935dupTGACAAC<br>AACAAAAGTATT | p.Gly646fsX0     | Insertion; frameshift | 2            | 1.0%       |
| c.1999G>T                             | p.Glu667X        | Premature stop codon  | 2            | 1.0%       |
| c.2299+1G>A                           | .                | Splice; donor         | 2            | 1.0%       |
| c.2427delT                            | p.Asn809LysfsX5  | Deletion; frameshift  | 2            | 1.0%       |
| c.14delG                              | p.Gly5AlafsX34   | Deletion; frameshift  | 1            | 0.5%       |
| c.235C>T                              | p.Arg79X         | Premature stop codon  | 1            | 0.5%       |
| c.368G>A                              | p.Trp123X        | Premature stop codon  | 1            | 0.5%       |
| c.658C>T                              | p.Gln220X        | Premature stop codon  | 1            | 0.5%       |
| c.1063C>T                             | p.Arg355X        | Premature stop codon  | 1            | 0.5%       |
| c.1177C>T                             | p.Gln393X        | Premature stop codon  | 1            | 0.5%       |
| c.1369_1372delCAAA                    | p.Gln457X        | Premature stop codon  | 1            | 0.5%       |
| c.1643delG                            | p.Gly548ValfsX15 | Deletion; frameshift  | 1            | 0.5%       |
| c.1689-1G>C                           | .                | Splice; acceptor      | 1            | 0.5%       |
| c.2013delC                            | p.Lys672ArgfsX12 | Deletion; frameshift  | 1            | 0.5%       |
| c.2198_2202delACACC                   | p.His733AlafsX8  | Deletion; frameshift  | 1            | 0.5%       |
| c.2421C>G                             | p.Tyr807X        | Premature stop codon  | 1            | 0.5%       |

|                     |                  |                       |   |      |
|---------------------|------------------|-----------------------|---|------|
| c.439A>T            | p.Arg147X        | Premature stop codon  | 1 | 0.5% |
| c.622_623insAA      | p.Thr208LysfsX56 | Insertion; frameshift | 1 | 0.5% |
| c.853dupG           | p.Ala285GlyfsX51 | Insertion; frameshift | 1 | 0.5% |
| c.962delT           | p.Val321AlafsX37 | Deletion; frameshift  | 1 | 0.5% |
| c.971_972insCT      | p.Ala325ArgfsX28 | Insertion; frameshift | 1 | 0.5% |
| c.975_976insAGCGGCC | p.Ala326SerfsX12 | Insertion; frameshift | 1 | 0.5% |
| c.1171-1G>C         | .                | Splice; acceptor      | 1 | 0.5% |
| c.1355T>A           | p.Leu452X        | Premature stop codon  | 1 | 0.5% |
| c.1521G>A           | p.Trp507X        | Premature stop codon  | 1 | 0.5% |
| c.1901delA          | p.Asn634ThrfsX21 | Deletion; frameshift  | 1 | 0.5% |
| c.1905delG          | p.Asn636IlefsX20 | Deletion; frameshift  | 1 | 0.5% |
| c.2182G>T           | p.Glu728X        | Premature stop codon  | 1 | 0.5% |
| c.2489+2dupT        | .                | Splice; donor         | 1 | 0.5% |

**Supplementary table II: 144 PKP2 truncating variants identified in 487 probands with arrhythmogenic right ventricular cardiomyopathy (ARVC cohort).**

| <i>Transcript Consequence</i> | <i>Consequence</i> | <i>Categorization</i> | <i>N<br/>(probands)</i> | <i>Proportion</i> |
|-------------------------------|--------------------|-----------------------|-------------------------|-------------------|
| c.2146-1G>C                   |                    | Splice; acceptor      | 61                      | 12.53%            |
| c.235C>T                      | p.Arg79X           | Premature stop codon  | 35                      | 7.19%             |
| c.2489+1G>A                   |                    | Splice; donor         | 28                      | 5.75%             |
| c.2197_2202delCACACCinsG      | p.His733AlafsX8    | Ins/del; frameshift   | 27                      | 5.54%             |
| c.148_151delACAG              | p.Thr50SerfsX61    | Deletion; frameshift  | 25                      | 5.13%             |
| c.1211dupT                    | p.Val406SerfsX4    | Insertion; frameshift | 16                      | 3.29%             |
| c.1237C>T                     | p.Arg413X          | Premature stop codon  | 16                      | 3.29%             |
| c.1613G>A                     | p.Trp538X          | Premature stop codon  | 12                      | 2.46%             |
| c.2509delA                    | p.Ser837ValfsX94   | Deletion; frameshift  | 11                      | 2.26%             |
|                               | Del exon 1-14      | CNV                   | 9                       | 1.85%             |
| c.1132C>T                     | p.Gln378X          | Premature stop codon  | 9                       | 1.85%             |
| c.1643delG                    | p.Gly548ValfsX15   | Deletion; frameshift  | 9                       | 1.85%             |
| c.1728_1729insGATG            | p.Arg577AspfsX5    | Insertion; frameshift | 9                       | 1.85%             |
| c.1912C>T                     | p.Gln638X          | Premature stop codon  | 9                       | 1.85%             |
| c.397C>T                      | p.Gln133X          | Premature stop codon  | 7                       | 1.44%             |
| c.1951C>T                     | p.Arg651X          | Premature stop codon  | 6                       | 1.23%             |
| c.2203C>T                     | p.Arg735X          | Premature stop codon  | 6                       | 1.23%             |
| c.253_256delGAGT              | p.Glu85MetfsX26    | Deletion; frameshift  | 5                       | 1.03%             |
| c.1369_1372delCAAA            | p.Gln457X          | Premature stop codon  | 5                       | 1.03%             |
| c.1848C>A                     | p.Tyr616X          | Premature stop codon  | 5                       | 1.03%             |
| c.987del                      | p.Ser329ArgfsX23   | Deletion; frameshift  | 4                       | 0.82%             |
| c.1378+1G>C                   |                    | Splice; donor         | 4                       | 0.82%             |
| c.2489+4A>C                   |                    | Splice; donor         | 4                       | 0.82%             |
| c.2554delG                    | p.Glu852AsnfsX79   | Premature stop codon  | 4                       | 0.82%             |
|                               | Del exon 2-14      | CNV                   | 3                       | 0.62%             |
| c.275T>A                      | p.Leu92X           | Premature stop codon  | 3                       | 0.62%             |
| c.917_918delCC                | p.Pro308GlnfsX29   | Deletion; frameshift  | 3                       | 0.62%             |
|                               | Del exon 4         | CNV                   | 3                       | 0.62%             |
| c.1378G>A                     |                    | Splice; donor         | 3                       | 0.62%             |
| c.1755_1756insTTGACTCA        | p.Leu586ThrfsX72   | Insertion; frameshift | 3                       | 0.62%             |
| c.1821dupC                    | p.Val608Cysfs*6    | Insertion; frameshift | 3                       | 0.62%             |
| c.2013delC                    | p.Lys672ArgfsX12   | Deletion; frameshift  | 3                       | 0.62%             |
| c.2176C>T                     | p.Gln726X          | Premature stop codon  | 3                       | 0.62%             |
| c.218dupG                     | p.Asn74GlnfsX12    | Insertion; frameshift | 2                       | 0.41%             |
| c.224-3C>G                    |                    | Splice; acceptor      | 2                       | 0.41%             |



|                                    |                   |                       |   |       |
|------------------------------------|-------------------|-----------------------|---|-------|
| c.433_434delCT                     | p.Leu145Glu fsX8  | Deletion; frameshift  | 2 | 0.41% |
| c.663C>A                           | p.Tyr221X         | Premature stop codon  | 2 | 0.41% |
| c.870G>A                           | p.Trp290X         | Premature stop codon  | 2 | 0.41% |
| c.971_980del10                     | p.Ala324Gly fsX25 | Deletion; frameshift  | 2 | 0.41% |
| c.1063C>T                          | p.Arg355X         | Premature stop codon  | 2 | 0.41% |
| c.1170+1G>A                        |                   | Splice; donor         | 2 | 0.41% |
| c.1171-2A>G                        |                   | Splice; acceptor      | 2 | 0.41% |
| c.1630_1631insTT                   | p.Pro544Leu fsX20 | Insertion; frameshift | 2 | 0.41% |
| c.1689-1G>C                        |                   | Splice; acceptor      | 2 | 0.41% |
| c.1803delC                         | p.D601EfsX655     | Deletion; frameshift  | 2 | 0.41% |
| c.1849C>T                          | p.Gln617*         | Premature stop codon  | 2 | 0.41% |
| c.1978C>T                          | p.Gln660X         | Premature stop codon  | 2 | 0.41% |
| c.2028G>A                          | p.Trp676X         | Premature stop codon  | 2 | 0.41% |
| c.2034G>A                          | p.Trp678X         | Premature stop codon  | 2 | 0.41% |
| c.2095C>T                          | p.Gln699X         | Premature stop codon  | 2 | 0.41% |
| c.2119C>T                          | p.Gln707X         | Premature stop codon  | 2 | 0.41% |
| c.2146-1_2146delGA                 |                   | Splice; acceptor      | 2 | 0.41% |
| c.2216_2217delAT                   | p.His739Arg fsX3  | Deletion; frameshift  | 2 | 0.41% |
| c.2421C>A                          | p.Tyr807X         | Premature stop codon  | 2 | 0.41% |
| c.2426dupA                         | p.Asn809Lys fsX18 | Insertion; frameshift | 2 | 0.41% |
| c.2490-1G>C                        |                   | Splice; acceptor      | 2 | 0.41% |
|                                    | Del exon 1-7      | CNV                   | 1 | 0.21% |
|                                    | Del exon 1-4      | CNV                   | 1 | 0.21% |
|                                    | 5' UTR dupl       | CNV                   | 1 | 0.21% |
| c.14delG                           | p.Gly5fs          | Deletion; frameshift  | 1 | 0.21% |
| c.175C>T                           | p.Gln59X          | Premature stop codon  | 1 | 0.21% |
| c.184_185delCA                     | p.Gln62Asp fsX23  | Deletion; frameshift  | 1 | 0.21% |
| c.190dupC                          | p.Leu64Pro fsX22  | Insertion; frameshift | 1 | 0.21% |
| c.219_223+5delCAACGGTGAG           |                   | Deletion; frameshift  |   |       |
|                                    | p.Asn74Gly fsX    | (spl)                 | 1 | 0.21% |
| c.223+1G>A                         |                   | Splice; donor         | 1 | 0.21% |
| c.258T>G                           | p.Tyr86X          | Premature stop codon  | 1 | 0.21% |
| c.268_272delACAC and<br>268_284ins | p.His91fsX94      | Ins/del; frameshift   | 1 | 0.21% |
| c.336+1G>A                         |                   | Splice; donor         | 1 | 0.21% |
| c.337-2A>T                         |                   | Splice; acceptor      | 1 | 0.21% |
| c.368G>A                           | p.Trp123X         | Premature stop codon  | 1 | 0.21% |
| c.451delT                          | p.Ser151fs        | Deletion; frameshift  | 1 | 0.21% |
| c.456delT                          | p.Asp153Thr fsX37 | Deletion; frameshift  | 1 | 0.21% |
| c.498C>G                           | p.Tyr166X         | Premature stop codon  | 1 | 0.21% |
| c.499T>A                           | p.Gln167X         | Premature stop codon  | 1 | 0.21% |
| C.504C>G                           | p.Tyr168X         | Premature stop codon  | 1 | 0.21% |
| c.508C>T                           | p.Gln170X         | Premature stop codon  | 1 | 0.21% |

|                         |                  |                       |   |       |
|-------------------------|------------------|-----------------------|---|-------|
| c.517C>T                | p.Gln173X        | Premature stop codon  | 1 | 0.21% |
| c.534_535insCT          | p.His179LeufsX12 | Insertion; frameshift | 1 | 0.21% |
| c.568delG               | p.Val190CysfsX73 | Deletion; frameshift  | 1 | 0.21% |
| c.587dup                | p.Ser197PhefsX19 | Insertion; frameshift | 1 | 0.21% |
| c.604insG               | p.Val202ValfsX13 | Insertion; frameshift | 1 | 0.21% |
| c.631C>T                | p.Gln211X        | Premature stop codon  | 1 | 0.21% |
| c.658C>T                | p.Gln220X        | Premature stop codon  | 1 | 0.21% |
| c.729C>G                | p.Tyr243X        | Premature stop codon  | 1 | 0.21% |
| c.771delG?              | p.Lys258ArgfsX5? | Deletion; frameshift  | 1 | 0.21% |
| c.775G>T                | p.Glu259X        | Premature stop codon  | 1 | 0.21% |
| c.795_811del            | p.Leu266GlnfsX64 | Deletion; frameshift  | 1 | 0.21% |
| c.801delT               | p.Thr268SerfsX34 | Deletion; frameshift  | 1 | 0.21% |
| c.841delA               | p.Thr281fs       | Deletion; frameshift  | 1 | 0.21% |
| c.898_901delACGC        | p.Thr300X        | Premature stop codon  | 1 | 0.21% |
| c.951delG               | p.His318ThrfsX2  | Deletion; frameshift  | 1 | 0.21% |
| Not reported            | p.His318TrpfsX10 | Ins/del; frameshift   | 1 | 0.21% |
| c.968_971delAGGC        | p.Gln323Argfs*28 | Deletion; frameshift  | 1 | 0.21% |
| c.971_972insT           | p.Ala324GlyfsX11 | Insertion; frameshift | 1 | 0.21% |
| c.982_983dupGG          | p.Ser329GlufsX24 | Insertion; frameshift | 1 | 0.21% |
| c.1034+1G>T             |                  | Splice; donor         | 1 | 0.21% |
| c.1035-2A>T             |                  | Splice; acceptor      | 1 | 0.21% |
| c.1035-1G>A             |                  | Splice; acceptor      | 1 | 0.21% |
| c.1125-32del            | p.Phe376AlafsX8  | Deletion; frameshift  | 1 | 0.21% |
| c.1138G>T               | p.Glu380X        | Premature stop codon  | 1 | 0.21% |
| c.1170+1G>C             |                  | Splice; donor         | 1 | 0.21% |
| c.1177C>T               | p.Gln393X        | Premature stop codon  | 1 | 0.21% |
| c.1202_1209delITGCAGCTC |                  |                       |   |       |
|                         | p.Leu401ProfsX6  | Deletion; frameshift  | 1 | 0.21% |
| c.1205del               | p.Gln402ArgfsX3  | Deletion; frameshift  | 1 | 0.21% |
| c.1231dup               | p.Val411GlyfsX15 | Insertion; frameshift | 1 | 0.21% |
| c.1234C>T               | p.Gln412X        | Premature stop codon  | 1 | 0.21% |
| c.1307_1315delins8      | p.Leu436HisfsX11 | Ins/del; frameshift   | 1 | 0.21% |
| c.1368delA              | p.Lys456AsnfsX3  | Deletion; frameshift  | 1 | 0.21% |
| c.1368insA              | p.Gln456ThrfsX12 | Insertion; frameshift | 1 | 0.21% |
| c.1375delA              | p.Thr459GlnfsX7  | Deletion; frameshift  | 1 | 0.21% |
|                         | Del exons 6-11   | CNV                   | 1 | 0.21% |
| c.1511-2A>G             |                  | Splice; acceptor      | 1 | 0.21% |
| c.1597delA              | p.Ile533SerfsX30 | Deletion; frameshift  | 1 | 0.21% |
| c.1597_1600delATCC      | p.Ile533ProfsX29 | Deletion; frameshift  | 1 | 0.21% |
| c.1648_1657del          | p.Leu550ThrfsX10 | Deletion; frameshift  | 1 | 0.21% |
| c.1664delT              | p.Phe555SerfsX8  | Deletion; frameshift  | 1 | 0.21% |
| c.1688+1G>A             |                  | Splice; donor         | 1 | 0.21% |
|                         | Del exon 8-14    | CNV                   | 1 | 0.21% |

|                     |                      |                       |   |       |
|---------------------|----------------------|-----------------------|---|-------|
| c.1704delT          | p.Gly569AlafsX8      | Deletion; frameshift  | 1 | 0.21% |
| c.1709delC          | p.Ala570ValfsX7      | Deletion; frameshift  | 1 | 0.21% |
| c.1759delG          | p.Val587SerfsX655    | Deletion; frameshift  | 1 | 0.21% |
| c.1760delT          | p.Val587Alafs*69     | Deletion; frameshift  | 1 | 0.21% |
| c.1799delA          | p.Asp600ValfsX56     | Deletion; frameshift  | 1 | 0.21% |
|                     | Del exons 9-11       | CNV                   | 1 | 0.21% |
| c.1893T>G           | p.Tyr631X            | Premature stop codon  | 1 | 0.21% |
| c.1948delA          | p.Ser650ValfsX6      | Deletion; frameshift  | 1 | 0.21% |
| c.1969G>T           | p.Glu657X            | Premature stop codon  | 1 | 0.21% |
|                     | Del exon 10          | CNV                   | 1 | 0.21% |
| c.2009delA          | p.Asn670ThrfsX14     | Deletion; frameshift  | 1 | 0.21% |
| c.2058T>G           | p.Tyr686X            | Premature stop codon  | 1 | 0.21% |
| c.2076_2077delAA    | p.Ser693CysfsX49     | Deletion; frameshift  | 1 | 0.21% |
| c.2087dupA          | p.Tyr697IlefsX46     | Insertion; frameshift | 1 | 0.21% |
| c.2145+1G>C         |                      | Splice; donor         | 1 | 0.21% |
| c.2145+3G>T         |                      | Splice; donor         | 1 | 0.21% |
| c.2179A>T           | p.Lys727X            | Premature stop codon  | 1 | 0.21% |
| c.2196_2197ins28    | p.His732AlafsX9      | Insertion; frameshift | 1 | 0.21% |
| c.2918_2202delACACC | p.His733AlafsX8      | Deletion; frameshift  | 1 | 0.21% |
| c.2240delA          | p.Lys747ArgfsX7      | Deletion; frameshift  | 1 | 0.21% |
| c.2299+1G>A         |                      | Splice; donor         | 1 | 0.21% |
| c.2447_2448delCC    | p.Thr816ArgfsX10     | Deletion; frameshift  | 1 | 0.21% |
| c.2489+1G>T         |                      | Splice; donor         | 1 | 0.21% |
| c.2544G>A           | p.Trp848X            | Premature stop codon  | 1 | 0.21% |
| c.2569_3018del50    | p.Tyr857ArgfsX2      | Deletion; frameshift  | 1 | 0.21% |
| c.2576delA          | p.Lys859ArgfsX881+48 | Deletion; frameshift  | 1 | 0.21% |
